# Supplementary material
Source: MDPI journal article supplement (https://www.mdpi.com/2306-5710/9/2/53)
Supplement: s1 [file s1]

# Supplementary Materials

**Table S1:** ANOVA results and mean intensities (n-cps) of the significant volatile mass ions ( $p \leq 0.05$ ) detected in the headspace of WFCPM milk by proton transfer reaction – mass spectrometry analysis during refrigerated storage at  $4.5 \pm 0.5$  °C between 3 and 26 days ( $n=5$ ).

| <i>m/z</i> | Storage Time (Day) |         |         |         |         |         |           |         |           |         |          | <i>df Num</i> = 11<br><i>df Den</i> = 312 | <i>F-ratio</i> | <i>p-value</i> |
|------------|--------------------|---------|---------|---------|---------|---------|-----------|---------|-----------|---------|----------|-------------------------------------------|----------------|----------------|
|            | 3                  | 7       | 14      | 16      | 18      | 20      | 21        | 22      | 23        | 24      | 25       | 26                                        |                |                |
| 33         | 783 e              | 583 abc | 823 e   | 611 bc  | 632 c   | 705 d   | 564 ab    | 547 a   | 583 abc   | 540 a   | 598 abc  | 543 a                                     | 62.77          | <0.001         |
| 41         | 89 a               | 66 a    | 156 cd  | 123 b   | 246 f   | 216 e   | 222 e     | 229 ef  | 122 b     | 135 bc  | 178 d    | 225 ef                                    | 191.8          | <0.001         |
| 42         | 84 def             | 63 a    | 86 def  | 77 bcde | 90 ef   | 70 abc  | 92 f      | 83 def  | 78 bcde   | 74 abcd | 83 cdef  | 67 ab                                     | 10.74          | <0.001         |
| 43         | 138 b              | 91 a    | 201 de  | 147 bc  | 184 d   | 168 bcd | 235 ef    | 257 f   | 264 f     | 178 cd  | 181 cd   | 891 g                                     | 690.0          | <0.001         |
| 45         | 56 a               | 46 a    | 172 bc  | 106 ab  | 231 cd  | 943 g   | 552 f     | 871 g   | 627 f     | 368 e   | 318 de   | 1246 h                                    | 355.7          | <0.001         |
| 46         | 3 ab               | 2 a     | 5 abc   | 4 abc   | 8 c     | 23 e    | 13 d      | 24 e    | 14 d      | 8 c     | 7 bc     | 29 f                                      | 102.7          | <0.001         |
| 47         | 14 a               | 15 a    | 22 a    | 13 a    | 24 a    | 103 d   | 53 c      | 55 c    | 131 e     | 39 b    | 56 c     | 247 f                                     | 535.7          | <0.001         |
| 53         | 12 ab              | 11 a    | 13 ab   | 11 a    | 13 ab   | 10 a    | 13 d      | 11 a    | 14 ab     | 20 c    | 16 b     | 12 ab                                     | 8.119          | <0.001         |
| 55         | 137 d              | 99 ab   | 139 d   | 122 cd  | 126 cd  | 86 a    | 140 d     | 112 bc  | 136 d     | 211 f   | 168 e    | 135 d                                     | 48.41          | <0.001         |
| 57         | 3 a                | 4 a     | 12 b    | 8 ab    | 22 c    | 25 c    | 21 c      | 25 c    | 11 b      | 9 ab    | 12 b     | 49 d                                      | 82.45          | <0.001         |
| 59         | 10371 efg          | 7585 ab | 9433 de | 8750 cd | 9720 ef | 6938 a  | 10250 efg | 8777 cd | 10424 fgh | 11336 h | 10741 gh | 8376 bc                                   | 45.30          | <0.001         |
| 60         | 357 ef             | 260 ab  | 315 cd  | 296 bcd | 335 de  | 237 a   | 356 ef    | 301 cd  | 366 ef    | 384 f   | 369 ef   | 283 bc                                    | 32.63          | <0.001         |
| 61         | 36 abc             | 29 ab   | 31 abc  | 30 ab   | 33 abc  | 26 a    | 36 abc    | 46 c    | 95 d      | 44 bc   | 38 abc   | 283 e                                     | 416.8          | <0.001         |
| 63         | 14 ab              | 14 abc  | 21 bcd  | 13 a    | 16 abc  | 16 abc  | 20 bcd    | 19 abcd | 23 d      | 25 d    | 21 cd    | 65 e                                      | 77.73          | <0.001         |
| 71         | 2 a                | 1 a     | 1 a     | 1 a     | 1 a     | 1 a     | 2 a       | 2 a     | 5 b       | 3 ab    | 1 a      | 33 c                                      | 202.8          | <0.001         |
| 73         | 642 c              | 485 b   | 616 c   | 606 c   | 652 c   | 401 a   | 628 c     | 480 ab  | 666 c     | 776 d   | 796 d    | 591 c                                     | 46.06          | <0.001         |
| 74         | 29 bcd             | 22 ab   | 29 bcd  | 29 bcd  | 31 cd   | 19 a    | 32 cd     | 24 abc  | 29 bcd    | 37 de   | 40 e     | 25 abc                                    | 13.26          | <0.001         |
| 89         | 3 ab               | 2 ab    | 2 a     | 2 ab    | 2 ab    | 4 ab    | 4 ab      | 4 ab    | 6 b       | 3 ab    | 3 ab     | 39 c                                      | 157.7          | <0.001         |

Means sharing the same alphabetic letter within the same row are not significantly different ( $p > 0.05$ ).

**Table S2:** ANOVA results and mean intensities (n-cps) of the significant volatile mass ions ( $p\leq0.05$ ) detected in the headspace of Tim milk by proton transfer reaction – mass spectrometry analysis during refrigerated storage at  $4.5 \pm 0.5$  °C between 3 and 26 days ( $n=5$ ).

| m/z | Storage Time (Day) |          |         |          |          |         |         |         |          |        |          |           |        |        | df Num = 11<br>df Den = 274 |  |
|-----|--------------------|----------|---------|----------|----------|---------|---------|---------|----------|--------|----------|-----------|--------|--------|-----------------------------|--|
|     | 3                  | 7        | 14      | 16       | 18       | 20      | 21      | 22      | 23       | 24     | 25       | 26        | F      | p      |                             |  |
| 31  | 26 b               | 24 ab    | 23 ab   | 27 ab    | 22 ab    | 28 b    | 27 b    | 17 a    | 20 ab    | 24 ab  | 24 ab    | 26 ab     | 2.30   | 0.01   |                             |  |
| 33  | 695 a              | 1387 e   | 1348 e  | 1195 cd  | 1245 cd  | 1562 f  | 1540 f  | 1263 de | 1314 c   | 1146 c | 1139 c   | 802 b     | 117.50 | <0.001 |                             |  |
| 41  | 104 ab             | 126 b    | 179 c   | 380 f    | 108 ab   | 123 ab  | 195 cd  | 77 a    | 83 ab    | 205 de | 198 cd   | 252 e     | 87.22  | <0.001 |                             |  |
| 42  | 95 bcd             | 83 abc   | 89 abcd | 111 e    | 99 de    | 103 cde | 96 cde  | 76 a    | 79 a     | 84 ab  | 83 abc   | 88 abcd   | 10.10  | <0.001 |                             |  |
| 43  | 122 a              | 145 cd   | 187 f   | 173 ef   | 134 bc   | 145 bc  | 160 de  | 107 a   | 113 a    | 228 g  | 143 cd   | 184 f     | 42.97  | <0.001 |                             |  |
| 45  | 66 a               | 111 a    | 204 a   | 1347 c   | 149 a    | 724 b   | 578 b   | 50 a    | 54 a     | 1161 c | 606 b    | 2276 d    | 286.65 | <0.001 |                             |  |
| 46  | 3 a                | 4 a      | 5 a     | 31 c     | 5 a      | 17 b    | 15 b    | 2 a     | 3 a      | 28 c   | 14 b     | 53 d      | 144.35 | <0.001 |                             |  |
| 47  | 15 a               | 22 a     | 39 a    | 178 b    | 41 a     | 29 a    | 187 b   | 22 a    | 17 a     | 342 d  | 314 c    | 659 e     | 399.93 | <0.001 |                             |  |
| 53  | 13 a               | 24 d     | 16 abc  | 21 cd    | 15 ab    | 21 bc   | 14 ab   | 11 a    | 12 a     | 13 a   | 15 ab    | 16 abc    | 12.11  | <0.001 |                             |  |
| 55  | 142 ab             | 276 g    | 169 de  | 204 f    | 143 bcd  | 187 e   | 135 ab  | 104 a   | 119 ab   | 140 ab | 133 ab   | 150 cde   | 67.46  | <0.001 |                             |  |
| 57  | 5 a                | 8 abc    | 12 bcd  | 14 cd    | 7 a      | 5 a     | 15 d    | 5 a     | 5 a      | 15 d   | 18 d     | 31 e      | 44.15  | <0.001 |                             |  |
| 59  | 12495 ef           | 12969 fg | 10631   | 12441 ef | 10938 cd | 14188g  | 9560ab  | 10460bc | 11430 de | 9838 a | 10857 cd | 10803 bcd | 27.97  | <0.001 |                             |  |
| 60  | 429 a              | 448 fg   | 360 abc | 419 def  | 375 cd   | 483 g   | 324 ab  | 346 abc | 375 cde  | 321 a  | 377 cde  | 367 bc    | 19.44  | <0.001 |                             |  |
| 63  | 18 a               | 22 abc   | 37 de   | 35 de    | 28 cd    | 23 abc  | 25 bc   | 19 ab   | 17 a     | 42 e   | 22 abc   | 40 e      | 26.43  | <0.001 |                             |  |
| 69  | 2 a                | 1 a      | 1 a     | 54 c     | 2 a      | 4 a     | 3 a     | 2 a     | 1 a      | 3 a    | 16 b     | 19 b      | 49.20  | <0.001 |                             |  |
| 73  | 708 bcd            | 1585 g   | 819 de  | 1083 f   | 777 cd   | 991 e   | 676 bcd | 541 a   | 602 ab   | 644 ab | 674 bc   | 800 cd    | 112.04 | <0.001 |                             |  |
| 74  | 30 ab              | 73 d     | 35 ab   | 51 c     | 35 ab    | 46 b    | 31 ab   | 25 a    | 27 a     | 30 ab  | 32 ab    | 34 ab     | 36.52  | <0.001 |                             |  |
| 87  | 1 a                | 2 a      | 2 a     | 14 c     | 2 a      | 3 a     | 3 a     | 2 a     | 2 a      | 3 a    | 9 b      | 14 c      | 32.73  | <0.001 |                             |  |

Means sharing the same alphabetic letter within the same row are not significantly different ( $p\leq0.05$ ).
